# Supplementary material for: Adverse impact of female reproductive signaling on age-dependent neurodegeneration after mild head trauma in Drosophila
Source: eLife. 2024 Aug 30;13:RP97908. doi: 10.7554/eLife.97908 (PMC11364438; doi:10.7554/eLife.97908)
Supplement: Supplementary file 1. — (a) List of all differentially expressed genes acutely after vmHT exposure. (b) List of all differentially expressed genes at the chronic time point (day 45) after vmHT exposure on day 3. (c) List of statistical comparisons and p-values. [file elife-97908-supp1.xlsx]

## Sheet: 1a
Supplementary file 1a
Males						Females mated w/ wildtype males						Virgin females						Females mated w/ SP0
FlyBase ID	Gene name	Function	Log2FoldChange	Shared?		FlyBase ID	Gene name	Function	Log2FoldChange	Shared?		FlyBase ID	Gene name	Function	Log2FoldChange	Shared?		FlyBase ID	Gene name	Function	Log2FoldChange	Shared?
FBgn0039682	Obp99c		-0.774453			FBgn0038914	fit		-1.53879			FBgn0036232	CG14125	chitin binding	-28.7717			FBgn0004240	DptA	immune	-7.10269
FBgn0002565	Lsp2	energy storage	-0.932173			FBgn0032136	Apoltp	lipid transport	-0.456213			FBgn0022355	Tsf1	immune	0.361427			FBgn0014859	Hr38	response to hormones	-0.309375
FBgn0037146	P5CS	energy metab	-0.766846			FBgn0030041	CG12116		-0.939531	w/ SP0-mated females		FBgn0032897	bero	neg. reg. of pain	0.65991			FBgn0085353	CG34324	chitin binding	2.94695	w/ virgins
FBgn0266347	nAChRα4	sleep promoting	0.410366			FBgn0040398	CG14629		-0.627199	w/ males		FBgn0030159	CG9689	head	0.651705			FBgn0085249	CG34220	chitin binding	1.41095	w/ virgins
FBgn0033820	CG4716	no clue	-0.497357			FBgn0283427	FASN1	energy	-0.449563	w/ males		FBgn0036422	CG3868		-3.4182			FBgn0034638	CG10433	receptivity	-0.272699
FBgn0025454	Cyp6g1	response to insecticide	-0.699296			FBgn0034394	CG15096		-0.943668			FBgn0085353	CG34324	chitin	-7.91561	w/ SP0-mated females		FBgn0263776	CG43693		-0.267493
FBgn0028526	CG15293	head	-0.673721			FBgn0034512	Bbd	immune	-0.824409			FBgn0085249	CG34220	chitin	-6.32509	w/ SP0-mated females		FBgn0036203	Muc68D	chitim binding	3.75841	w/ virgins
FBgn0000053	Gart	IMP synthesis	-0.551394	w/ wt-mated females		FBgn0032945	CG8665		-1.46148			FBgn0267348	LanB2	development	0.375229			FBgn0041194	Prat2	IMP synthesis	-0.665311
FBgn0040653	Dso1	immune	-0.72422			FBgn0035091	CG3829		-0.887599			FBgn0043575	PGRP-SC2	immune	-1.90496			FBgn0261714	Cpn	visual	-1.07064
FBgn0001114	Glt	axon outgrowth	-0.528692			FBgn0003731	Egfr		-0.595582			FBgn0032899	CG9338	sleep	0.604614			FBgn0030258	CG1552		-0.224968
FBgn0001208	Hn	serotonin and dopamine	-0.676319			FBgn0032322	CG16743		-0.477539	w/ SP0-mated females		FBgn0051901	Mur29B	extracellular matrix	-2.92253			FBgn0030041	CG12116		-0.502028	w/ wt-mated females
FBgn0267910	lncRNA:CR34335		0.359752			FBgn0035770	pst	LTM	-0.410713			FBgn0002526	LanA	development	0.322749			FBgn0032322	CG16743		-0.273258	w/ wt-mated females
FBgn0038147	CCHa2	stimulate food intake via hormone pathway	-0.449931	w/ wt-mated females		FBgn0086687	Desat1	immune	-0.399547	w/ males		FBgn0036203	Muc68D	extracellular matrix	-9.17141	w/ SP0-mated females		FBgn0035880	Culd	visual	-0.637988
FBgn0034229	CtsK2	sexual reproduction	-0.779999	w/ wt-mated females		FBgn0020415	Idgf2	apoptosis	-0.530962			FBgn0002578	Kaz-m1	not sure	-3.34278
FBgn0034290	CG5773	visual	-1.10013			FBgn0029769	frma	female receptivity	-1.12443			FBgn0014019	Rh5	visual	0.835221
FBgn0034885	Eglp4	renal system	-0.645755			FBgn0031461	daw	hormone and metabolism	-0.579938			FBgn0011722	Tig	hemolyph clot	0.674428	w/ wt-mated females
FBgn0038074	Gnmt	metab	-1.57809			FBgn0020513	Paics	IMP synthesis	-0.604583	w/ males
FBgn0035090	CG2736		-0.632428			FBgn0028371	jbug	actin-binding and visual	-0.715058
FBgn0015575	α-Est7	lipid metab	-0.568142			FBgn0031538	CG3246		-0.826486
FBti0062593	transposable element		0.853654			FBgn0051326	CG31326		-1.11504
FBgn0034331	BomBc2	defense	-0.68336			FBgn0036501	CG7272		-0.588752
FBgn0263476	snoRNA:CG32479-b		0.887812			FBgn0013763	Idgf6	chitin-binding	-0.545141	w/ males
FBgn0259682	Jabba	lipid droplet protein/ immune	-0.480898			FBgn0011722	Tig	hemolymph clot?	-0.619497	w/ virgins
FBgn0025583	BomS2	imune	-0.584806			FBgn0028543	NimB2	development	-0.526805
FBgn0020385	pug	energy metab	-0.591698			RR46358_transposable_element			0.517866
FBgn0051869	CG31869	BMP binding	0.293488			FBgn0031560	CG16713		-1.34235
FBgn0032726	CG10621	energy metab	-0.804016	w/ wt-mated females		FBgn0043783	CG32444		-0.960435
FBgn0263461	snoRNA:CG32479-a		0.8024			FBgn0000053	Gart	metabolism	-0.529628	w/ males
FBgn0034162	CG6426	lysosome and sexual reproduction and IM	-0.72154			FBgn0026576	Pisd	metabolism	-0.339394
FBgn0000406	Cyt-b5-r	maybe metab	-0.687927			FBgn0034761	CG4250		-0.430955
FBgn0020513	Paics	IMP synthesis	-0.385933	w/ wt-mated females		FBgn0035978	UGP	hyperoxia and metabolism	-0.376705
FBgn0031561	IM33	immune	-0.623541			FBgn0264494	CG17646	metabolism	-0.331004
FBgn0034200	Gbp2	response to stimulus	-0.574618			FBgn0016122	Acer	circadian rhythm and metabolism	-0.508769
FBgn0029823	Shmt	metabolism and circadian rhythm	-0.334952			FBgn0032726	CG10621	maybe metab	-0.972837	w/ males
FBgn0041337	Cyp309a2	metab of insect hormones and response to insecticides	-0.968254			FBgn0261588	pdm3	smell perception	0.238102
FBgn0086691	UK114	protein chaperon similar to HSP70	-0.76122			FBgn0033366	Ance-4	protein metab	-0.956597
FBti0019429	transposable element		0.588459			FBgn0000163	Baz	egg development	-0.581877
FBgn0032285	CG17108	head	-0.625644	w/ wt-mated females		FBgn0011705	rost	development gene	-1.06234
FBgn0086687	Desat1	male mating behavior	-0.20945	w/ wt-mated females		FBgn0263072	CG43347	neg reg of transcription	0.198433
FBgn0085195	CG34166	head	-0.593485	w/ wt-mated females		FBgn0000592	Est-6	reproduction	-1.64582
FBgn0261575	tobi	carbo metab	-0.860328			FBgn0039801	Npc2h	imune	-1.4079
FBti0062383	transposable element		-1.89914			FBgn0259145	CG42260	some ion channel	0.199829
FBgn0015039	Cyp9b2	metab of insect hormones and response to insecticides	-0.69275			FBgn0052687	CG32687	signal transduction	-0.678298
FBgn0087002	apolpp	metab	-0.214003	w/ wt-mated females		FBgn0031305	Iris	some virus gene?	-0.825246
FBgn0029828	CG6067	head	-0.695318			FBgn0039241	CG11089	involved in wound healing	-0.598912	w/ males
FBgn0283427	FASN1	metab	-0.234711	w/ wt-mated females		FBgn0267665	lncRNA:CR46003		0.335764
FBgn0040736	BomS3	immune	-0.846029			FBgn0260474	CG30002	metabolism	-1.80199
FBgn0029831	CG5966	metab	-0.903749			FBgn0263077	M7BP	filopodium assembly and cytoskeleton	-0.516407
FBgn0038465	Irc	response to oxidative stress	-0.194903			FBgn0041182	Tep2	imune	-0.342373
FBgn0058469	lncRNA:CR40469		0.441745			FBgn0038250	CG3505	protein metab	-1.02448
FBgn0051769	CG31769	head	-0.661232			FBgn0031220	CG4822	some membrane protein	-0.483744
FBgn0086670	snoRNA:Ψ28S-2622		1.01588			FBgn0031805	Nepl4	proteolysis	-1.18914
FBgn0263470	snoRNA:Tudor-SN-a		0.359048			FBti0063239	transposable element		0.605095
FBgn0039800	Npc2g	sterol transport	-0.605903			FBti0062461	transposable element		0.290893
FBgn0033913	CG8468	metab	-0.690566			FBgn0037387	CG1213	membrane transporter	-0.996908	w/ males
FBgn0029990	CG2233	head	-0.653062			FBgn0000473	Cyp6a2	reponse to oxygen caffeine DDT	-0.491964
FBgn0031449	CG31689	ATP binding	-0.276929			FBgn0034229	CtsK2	reproduction	-0.983236	w/ males
FBgn0037191	CG14448	spermatozoon	0.678818			FBgn0020617	Rx	gene expression in development	0.414051
FBgn0010222	Nmdmc	metab	-0.468618			FBgn0020416	Idgf1	chitin binding and wound healing	-0.6248
FBgn0259715	CG42369		-0.465146			FBgn0038147	CCHa2	stimulate food intake via hormone pathway	-0.612546	w/ males
FBgn0065073	snoRNA:229		1.28862			FBti0020410	transposable element		0.28177
FBgn0287606	lncRNA:CR46475		0.630041			FBgn0053196	dpy	epidermal-cuticle attachment and trachea	-0.515862
FBgn0040827	CG13315		-0.401981			FBgn0010651	MFS14	response to hypoxia	-0.34709
FBgn0037387	CG1213	head	-0.414584	w/ wt-mated females		FBgn0051778	CG31778		-0.938283
FBgn0029820	CG16721	signaling	-0.224445			FBgn0000477	DNaseII	apoptosis	-0.45837
FBgn0039241	CG11089	wound healing	-0.417155	w/ wt-mated females		FBgn0031630	CG15629		-0.632988
FBti0059668	transposable element		0.749566			FBgn0034335	GstE1	response to heat	-0.524718
FBgn0013763	Idgf6	chitin binding	-0.33931	w/ wt-mated females		FBgn0053120	CG33120	head specific	-0.803506
FBti0020280	transposable element		0.656605			FBgn0039161	CG13606	head specific	-1.17997
FBgn0031432	Cyp309a1	metab of insect hormones and response to insecticides	-0.855527			FBgn0034717	CG5819		-0.951728
FBgn0010383	Cyp18a1		-0.794921			FBgn0005612	Sox14	tf in neurogenesis	-0.452415
FBgn0040398	CG14629	head	-0.420623	w/ wt-mated females		FBgn0013949	Elal	response to nicotine	-0.492556
						FBgn0031913	CG5958	visual	-0.62402
						RR50446_transposable_element			0.319235
						FBgn0032507	CG9377	protein metab	1.2676
						FBgn0037819	Phyhd1	glial	-0.348432
						FBgn0038984	AdipoR	insulin signaling	-0.249383
						RR48376_transposable_element			0.385817
						FBgn0037801	CG3999	metab	-0.860189
						FBgn0004784	inaC	visual	-0.654049
						FBgn0001149	GstD1	not sure	-0.240434
						FBgn0023441	fus	splicing factor	-0.782661
						FBgn0032285	CG17108	head	-1.14502	w/ males
						FBgn0036975	CG5618	metab	-0.417415
						FBgn0014031	Agxt	enzyme	-0.847162
						FBgn0035280	Cpr62Bb	cuticle and chitin	-1.4301
						FBgn0051103	CG31103	transmembrane transport	-1.41303
						FBgn0264699	CG43968		1.46958
						FBgn0051538	CG31538	head	0.281457
						FBgn0262139	trh	trachea	-0.379669
						FBti0060955	transposable element		1.085
						FBgn0085195	CG34166	head	-0.94391	w/ males
						FBgn0004047	Yp3	egg development	-0.866771
						FBgn0030266	CG11122	nervous system	0.186776
						FBgn0035321	CG1275	nervous sytem	-0.210185
						FBgn0052702	Cubn	required in nephrocyte	0.244267
						FBgn0039311	CG10513	Ecdysteroid kinase-like	-0.397687
						FBgn0033170	sPLA2	metab	-0.778662
						FBgn0000003	7SLRNA:CR32864	targets ER	0.318053
						FBgn0031107	HERC2	protein ubiquitination	0.214778
						FBti0062672	transposable element		1.80512
						FBgn0030925	Hayan	imune	-1.38057
						FBgn0026061	Mipp1	trachea development	-0.558072
						FBgn0034432	Acadvl	metab	-0.317625
						FBgn0087002	apolpp	metab	-0.600273	w/ males
						FBgn0005391	Yp2	egg dev	-1.00664
						FBgn0026403	Ndg	cell adhesion glycoprotein	-0.597138
						FBgn0033782	sug	carbohydrate metab	-0.85754
						FBgn0004623	Gβ76C	visual	-0.629921
						FBgn0036433	CG9628	septate junction assembly	-0.526279

## Sheet: 1b
Supplementary file 1b
Males						Females mated w/ wildtype males						Virgin females						Females mated w/ SP0
FlyBase ID	Gene name	Function	Log2FoldChange	Shared?		FlyBase ID	Gene name	Function	Log2FoldChange	Shared?		FlyBase ID	Gene name	Function	Log2FoldChange	Shared?		FlyBase ID	Gene name	Function	Log2FoldChange	Shared?
FBgn0000120	Arr1	Visual	-0.660052			FBgn0014865	Mtk	immune	-1.84856			FBgn0029966	Ir7c	Taste receptor	-4.79005			FBgn0026418	Hsp110	Response to heat shock	-0.319379
FBgn0004784	inaC	Visual	-1.15397			FBgn0030304	Cyp4g15		-0.231874			FBti0020280			0.420139			FBgn0036145	CG7607		0.368973
FBgn0041581	AttB	immune	-2.94077			FBgn0034407	DptB	immune	-6.21631									FBgn0037788	CAH7	metab	0.28919
FBgn0003250	Rh4	visual	-0.650761			FBgn0036262	Miox		0.360309									FBgn0010225	Gel	actin binding	0.21914
FBgn0026314	Ugt35B1		-0.263186			FBgn0038877	CG3308		-0.30297									FBgn0012344	Dh44	hormones and response to pain	-0.223383
FBgn0001233	HSP83	immune	-0.417748			FBgn0268063	ltl	development	-0.28875									FBgn0015577	α-Est9		0.282428
FBgn0033728	Cpr49Ae	cuticle	-2.91626			FBgn0033367	PPO2	immune	0.44563									FBgn0034398	CG15098		0.20314
FBgn0012042	AttA	immune	-1.24461			FBgn0001233	HSP83	immune	-0.243475	w/ SP0-mated females								FBgn0036663	CG9674	NADH activity	-0.16842
FBgn0002938	ninaC	visual	-0.483038															FBgn0259108	futsch	actin binding and axon regeneration	-0.180246
FBgn0034328	BomBc1	immune	-1.72231															FBgn0262593	Shab	neuronal excitability	-0.142266
																		FBgn0039844	CG1607		-0.248855
																		FBgn0001233	HSP83	Immune	-0.52852	w/ wt-mated females
																		FBgn0004575	Syn	synaptic vesicles	-0.145657
																		FBgn0014906	Hydr2	lipid metab	0.189311
																		FBgn0031313	CG5080		0.201603
																		FBgn0263106	DnaJ-1	HSP co-factor regulating proteins whose misfolding leads to age-dependent neurodegeneration	-0.564874
																		FBgn0020618	Rack1	devleopment and reproduction+ cellular response to starvation+egg-laying	0.157631
																		FBgn0086677	jeb	dev	-0.221336
																		FBgn0051221	CG31221		-0.156179

## Sheet: 1c
Supplementary file 1c
1. Statistical comparisons for mNGA on D45 using repeated measures ANOVA
	A. Female flies, comparing sham, D3, D17, and D31Inj.
	Error: factor(Time)
		Df Sum Sq Mean Sq F value Pr(>F)
	Residuals 10 2154 215.4
	Error: Within
	Df Sum Sq Mean Sq F value Pr(>F)
	factor(injury) 3 120.0 40.01 62.56 <2e-16 ***
	Residuals 327 209.1 0.64
	Significance codes: 0 ‘***’ 0.001 ‘**’ 0.01 ‘*’ 0.05 ‘.’ 0.1 ‘ ’ 1
	Pair-wise comparisons
	Time	.y.	group1	group2	n1	n2	p	p.signif	p.adj	p.adj.signif
	0s	CI	Sham	D3Inj	9	9	0.74	ns	1	ns
	0s	CI	Sham	D17Inj	9	9	0.0803	ns	0.482	ns
	0s	CI	D3Inj	D17Inj	9	9	0.124	ns	0.742	ns
	0s	CI	Sham	D31Inj	9	9	0.257	ns	1	ns
	0s	CI	D3Inj	D31Inj	9	9	0.408	ns	1	ns
	0s	CI	D17Inj	D31Inj	9	9	0.348	ns	1	ns
	1s	CI	Sham	D3Inj	9	9	0.247	ns	1	ns
	1s	CI	Sham	D17Inj	9	9	0.0293	*	0.176	ns
	1s	CI	D3Inj	D17Inj	9	9	0.146	ns	0.874	ns
	1s	CI	Sham	D31Inj	9	9	0.0031	**	0.0186	*
	1s	CI	D3Inj	D31Inj	9	9	0.0421	*	0.253	ns
	1s	CI	D17Inj	D31Inj	9	9	0.97	ns	1	ns
	2s	CI	Sham	D3Inj	9	9	0.171	ns	1	ns
	2s	CI	Sham	D17Inj	9	9	0.0109	*	0.0655	ns
	2s	CI	D3Inj	D17Inj	9	9	0.0865	ns	0.519	ns
	2s	CI	Sham	D31Inj	9	9	0.000263	***	0.00158	**
	2s	CI	D3Inj	D31Inj	9	9	0.00786	**	0.0471	*
	2s	CI	D17Inj	D31Inj	9	9	0.78	ns	1	ns
	3s	CI	Sham	D3Inj	9	9	0.335	ns	1	ns
	3s	CI	Sham	D17Inj	9	9	0.0268	*	0.161	ns
	3s	CI	D3Inj	D17Inj	9	9	0.106	ns	0.634	ns
	3s	CI	Sham	D31Inj	9	9	0.000286	***	0.00172	**
	3s	CI	D3Inj	D31Inj	9	9	0.00318	**	0.0191	*
	3s	CI	D17Inj	D31Inj	9	9	0.527	ns	1	ns
	4s	CI	Sham	D3Inj	9	9	0.263	ns	1	ns
	4s	CI	Sham	D17Inj	9	9	0.0196	*	0.118	ns
	4s	CI	D3Inj	D17Inj	9	9	0.0998	ns	0.599	ns
	4s	CI	Sham	D31Inj	9	9	0.000297	***	0.00178	**
	4s	CI	D3Inj	D31Inj	9	9	0.00481	**	0.0288	*
	4s	CI	D17Inj	D31Inj	9	9	0.624	ns	1	ns
	5s	CI	Sham	D3Inj	9	9	0.206	ns	1	ns
	5s	CI	Sham	D17Inj	9	9	0.0069	**	0.0414	*
	5s	CI	D3Inj	D17Inj	9	9	0.0508	ns	0.305	ns
	5s	CI	Sham	D31Inj	9	9	0.000234	***	0.0014	**
	5s	CI	D3Inj	D31Inj	9	9	0.00551	**	0.033	*
	5s	CI	D17Inj	D31Inj	9	9	0.9	ns	1	ns
	6s	CI	Sham	D3Inj	9	9	0.167	ns	1	ns
	6s	CI	Sham	D17Inj	9	9	0.00354	**	0.0212	*
	6s	CI	D3Inj	D17Inj	9	9	0.0341	*	0.205	ns
	6s	CI	Sham	D31Inj	9	9	0.000177	***	0.00106	**
	6s	CI	D3Inj	D31Inj	9	9	0.00565	**	0.0339	*
	6s	CI	D17Inj	D31Inj	9	9	0.95	ns	1	ns
	7s	CI	Sham	D3Inj	9	9	0.118	ns	0.707	ns
	7s	CI	Sham	D17Inj	9	9	0.00383	**	0.023	*
	7s	CI	D3Inj	D17Inj	9	9	0.0485	*	0.291	ns
	7s	CI	Sham	D31Inj	9	9	0.00019	***	0.00114	**
	7s	CI	D3Inj	D31Inj	9	9	0.00942	**	0.0565	ns
	7s	CI	D17Inj	D31Inj	9	9	0.96	ns	1	ns
	8s	CI	Sham	D3Inj	9	9	0.0253	*	0.152	ns
	8s	CI	Sham	D17Inj	9	9	0.00745	**	0.0447	*
	8s	CI	D3Inj	D17Inj	9	9	0.21	ns	1	ns
	8s	CI	Sham	D31Inj	9	9	0.000153	***	0.00092	***
	8s	CI	D3Inj	D31Inj	9	9	0.0394	*	0.236	ns
	8s	CI	D17Inj	D31Inj	9	9	0.791	ns	1	ns
	9s	CI	Sham	D3Inj	9	9	0.0182	*	0.109	ns
	9s	CI	Sham	D17Inj	9	9	0.0087	**	0.0522	ns
	9s	CI	D3Inj	D17Inj	9	9	0.272	ns	1	ns
	9s	CI	Sham	D31Inj	9	9	0.000121	***	0.000725	***
	9s	CI	D3Inj	D31Inj	9	9	0.0437	*	0.262	ns
	9s	CI	D17Inj	D31Inj	9	9	0.698	ns	1	ns
	10s	CI	Sham	D3Inj	9	9	0.0356	*	0.213	ns
	10s	CI	Sham	D17Inj	9	9	0.0114	*	0.0686	ns
	10s	CI	D3Inj	D17Inj	9	9	0.236	ns	1	ns
	10s	CI	Sham	D31Inj	9	9	0.00101	**	0.00608	**
	10s	CI	D3Inj	D31Inj	9	9	0.122	ns	0.73	ns
	10s	CI	D17Inj	D31Inj	9	9	0.954	ns	1	ns
	B. Male flies, comparing sham, D3, D17, and D31Inj.
	Error: factor(Time)
		Df Sum Sq Mean Sq F value Pr(>F)
	Residuals 10 934.4 93.44
	Error: Within
		Df Sum Sq Mean Sq F value Pr(>F)
	factor(injury) 3 57.22 19.074 22.64 1.2e-11 ***
	Residuals 118 99.43 0.843
	Signif. codes: 0 ‘***’ 0.001 ‘**’ 0.01 ‘*’ 0.05 ‘.’ 0.1 ‘ ’ 1
	Time	.y.	group1	group2	n1	n2	p	p.signif	p.adj	p.adj.signif
	0s	CI	Sham	D3Inj	9	9	0.761	ns	1	ns
	0s	CI	Sham	D17Inj	9	9	0.122	ns	0.735	ns
	0s	CI	D3Inj	D17Inj	9	9	0.0755	ns	0.453	ns
	0s	CI	Sham	D31Inj	9	9	0.15	ns	0.901	ns
	0s	CI	D3Inj	D31Inj	9	9	0.093	ns	0.558	ns
	0s	CI	D17Inj	D31Inj	9	9	0.896	ns	1	ns
	1s	CI	Sham	D3Inj	9	9	0.389	ns	1	ns
	1s	CI	Sham	D17Inj	9	9	0.00604	**	0.0363	*
	1s	CI	D3Inj	D17Inj	9	9	0.0236	*	0.141	ns
	1s	CI	Sham	D31Inj	9	9	0.005	**	0.03	*
	1s	CI	D3Inj	D31Inj	9	9	0.0192	*	0.115	ns
	1s	CI	D17Inj	D31Inj	9	9	0.897	ns	1	ns
	2s	CI	Sham	D3Inj	9	9	0.428	ns	1	ns
	2s	CI	Sham	D17Inj	9	9	0.00793	**	0.0476	*
	2s	CI	D3Inj	D17Inj	9	9	0.028	*	0.168	ns
	2s	CI	Sham	D31Inj	9	9	0.00166	**	0.00999	**
	2s	CI	D3Inj	D31Inj	9	9	0.0052	**	0.0312	*
	2s	CI	D17Inj	D31Inj	9	9	0.292	ns	1	ns
	3s	CI	Sham	D3Inj	9	9	0.789	ns	1	ns
	3s	CI	Sham	D17Inj	9	9	0.0834	ns	0.5	ns
	3s	CI	D3Inj	D17Inj	9	9	0.127	ns	0.765	ns
	3s	CI	Sham	D31Inj	9	9	0.0168	*	0.101	ns
	3s	CI	D3Inj	D31Inj	9	9	0.0257	*	0.154	ns
	3s	CI	D17Inj	D31Inj	9	9	0.331	ns	1	ns
	4s	CI	Sham	D3Inj	9	9	0.778	ns	1	ns
	4s	CI	Sham	D17Inj	9	9	0.188	ns	1	ns
	4s	CI	D3Inj	D17Inj	9	9	0.285	ns	1	ns
	4s	CI	Sham	D31Inj	9	9	0.0387	*	0.232	ns
	4s	CI	D3Inj	D31Inj	9	9	0.061	ns	0.366	ns
	4s	CI	D17Inj	D31Inj	9	9	0.332	ns	1	ns
	5s	CI	Sham	D3Inj	9	9	0.724	ns	1	ns
	5s	CI	Sham	D17Inj	9	9	0.373	ns	1	ns
	5s	CI	D3Inj	D17Inj	9	9	0.58	ns	1	ns
	5s	CI	Sham	D31Inj	9	9	0.0651	ns	0.39	ns
	5s	CI	D3Inj	D31Inj	9	9	0.114	ns	0.687	ns
	5s	CI	D17Inj	D31Inj	9	9	0.267	ns	1	ns
	6s	CI	Sham	D3Inj	9	9	0.77	ns	1	ns
	6s	CI	Sham	D17Inj	9	9	0.493	ns	1	ns
	6s	CI	D3Inj	D17Inj	9	9	0.688	ns	1	ns
	6s	CI	Sham	D31Inj	9	9	0.108	ns	0.648	ns
	6s	CI	D3Inj	D31Inj	9	9	0.17	ns	1	ns
	6s	CI	D17Inj	D31Inj	9	9	0.307	ns	1	ns
	7s	CI	Sham	D3Inj	9	9	0.951	ns	1	ns
	7s	CI	Sham	D17Inj	9	9	0.862	ns	1	ns
	7s	CI	D3Inj	D17Inj	9	9	0.814	ns	1	ns
	7s	CI	Sham	D31Inj	9	9	0.121	ns	0.724	ns
	7s	CI	D3Inj	D31Inj	9	9	0.11	ns	0.657	ns
	7s	CI	D17Inj	D31Inj	9	9	0.158	ns	0.949	ns
	8s	CI	Sham	D3Inj	9	9	0.918	ns	1	ns
	8s	CI	Sham	D17Inj	9	9	0.689	ns	1	ns
	8s	CI	D3Inj	D17Inj	9	9	0.616	ns	1	ns
	8s	CI	Sham	D31Inj	9	9	0.133	ns	0.795	ns
	8s	CI	D3Inj	D31Inj	9	9	0.113	ns	0.677	ns
	8s	CI	D17Inj	D31Inj	9	9	0.244	ns	1	ns
	9s	CI	Sham	D3Inj	9	9	0.882	ns	1	ns
	9s	CI	Sham	D17Inj	9	9	0.61	ns	1	ns
	9s	CI	D3Inj	D17Inj	9	9	0.513	ns	1	ns
	9s	CI	Sham	D31Inj	9	9	0.166	ns	0.994	ns
	9s	CI	D3Inj	D31Inj	9	9	0.132	ns	0.79	ns
	9s	CI	D17Inj	D31Inj	9	9	0.349	ns	1	ns
	10s	CI	Sham	D3Inj	9	9	0.624	ns	1	ns
	10s	CI	Sham	D17Inj	9	9	0.546	ns	1	ns
	10s	CI	D3Inj	D17Inj	9	9	0.907	ns	1	ns
	10s	CI	Sham	D31Inj	9	9	0.0515	ns	0.309	ns
	10s	CI	D3Inj	D31Inj	9	9	0.113	ns	0.68	ns
	10s	CI	D17Inj	D31Inj	9	9	0.136	ns	0.817	ns
	2. Statistical analyses of vacuole formation using Wilcoxon rank sum tests.
	A. Comparing number of vacuoles in female brains of sham, D3Inj, D17Inj, and D31Inj conditions.
	Kruskal-Wallis rank sum test
	data: total.no by injury
	Kruskal-Wallis chi-squared = 26.285, df = 3, p-value = 8.312e-06
	Pairwise comparisons using Wilcoxon rank sum test with continuity correction
	data: data.F$total.no and data.F$injury
	sham D3inj D17inj
	D3inj 0.01165 - -
	D17inj 0.00029 0.21596 -
	D31inj 0.00015 0.21596 0.81813
	B. Comparing total size of vacuoles in female brains of sham, D3Inj, D17Inj, and D31Inj conditions.
	Kruskal-Wallis rank sum test
	data: total.area by injury
	Kruskal-Wallis chi-squared = 23.506, df = 3, p-value = 3.167e-05
	Pairwise comparisons using Wilcoxon rank sum exact test
	data: data.F$total.area and data.F$injury
	sham D3inj D17inj
	D3inj 0.05081 - -
	D17inj 0.00017 0.13482 -
	D31inj 0.00022 0.42351 0.42351
	C. Comparing number of vacuoles in male brains of sham, D3Inj, D17Inj, and D31Inj conditions.
	Kruskal-Wallis rank sum test
	data: total.no by injury
	Kruskal-Wallis chi-squared = 15.336, df = 3, p-value = 0.001551
	Pairwise comparisons using Wilcoxon rank sum test with continuity correction
	data: data.M$total.no and data.M$injury
	sham D3inj D17inj
	D3inj 0.18399 - -
	D17inj 0.46556 0.79596 -
	D31inj 0.00048 0.18399 0.18399
	D. Comparing total size of vacuoles in male brains of sham, D3Inj, D17Inj, and D31Inj conditions.
	Kruskal-Wallis rank sum test
	data: total.area by injury
	Kruskal-Wallis chi-squared = 15.163, df = 3, p-value = 0.001682
	Pairwise comparisons using Wilcoxon rank sum test with continuity correction
	data: data.M$total.area and data.M$injury
	sham D3inj D17inj
	D3inj 1.0000 - -
	D17inj 1.0000 1.0000 -
	D31inj 0.0029 0.0087 0.2101
